# Supplementary material
Source: Research Square preprint supplement (doi:10.21203/rs.3.rs-8928995/v1)

**Graphical Abstract**


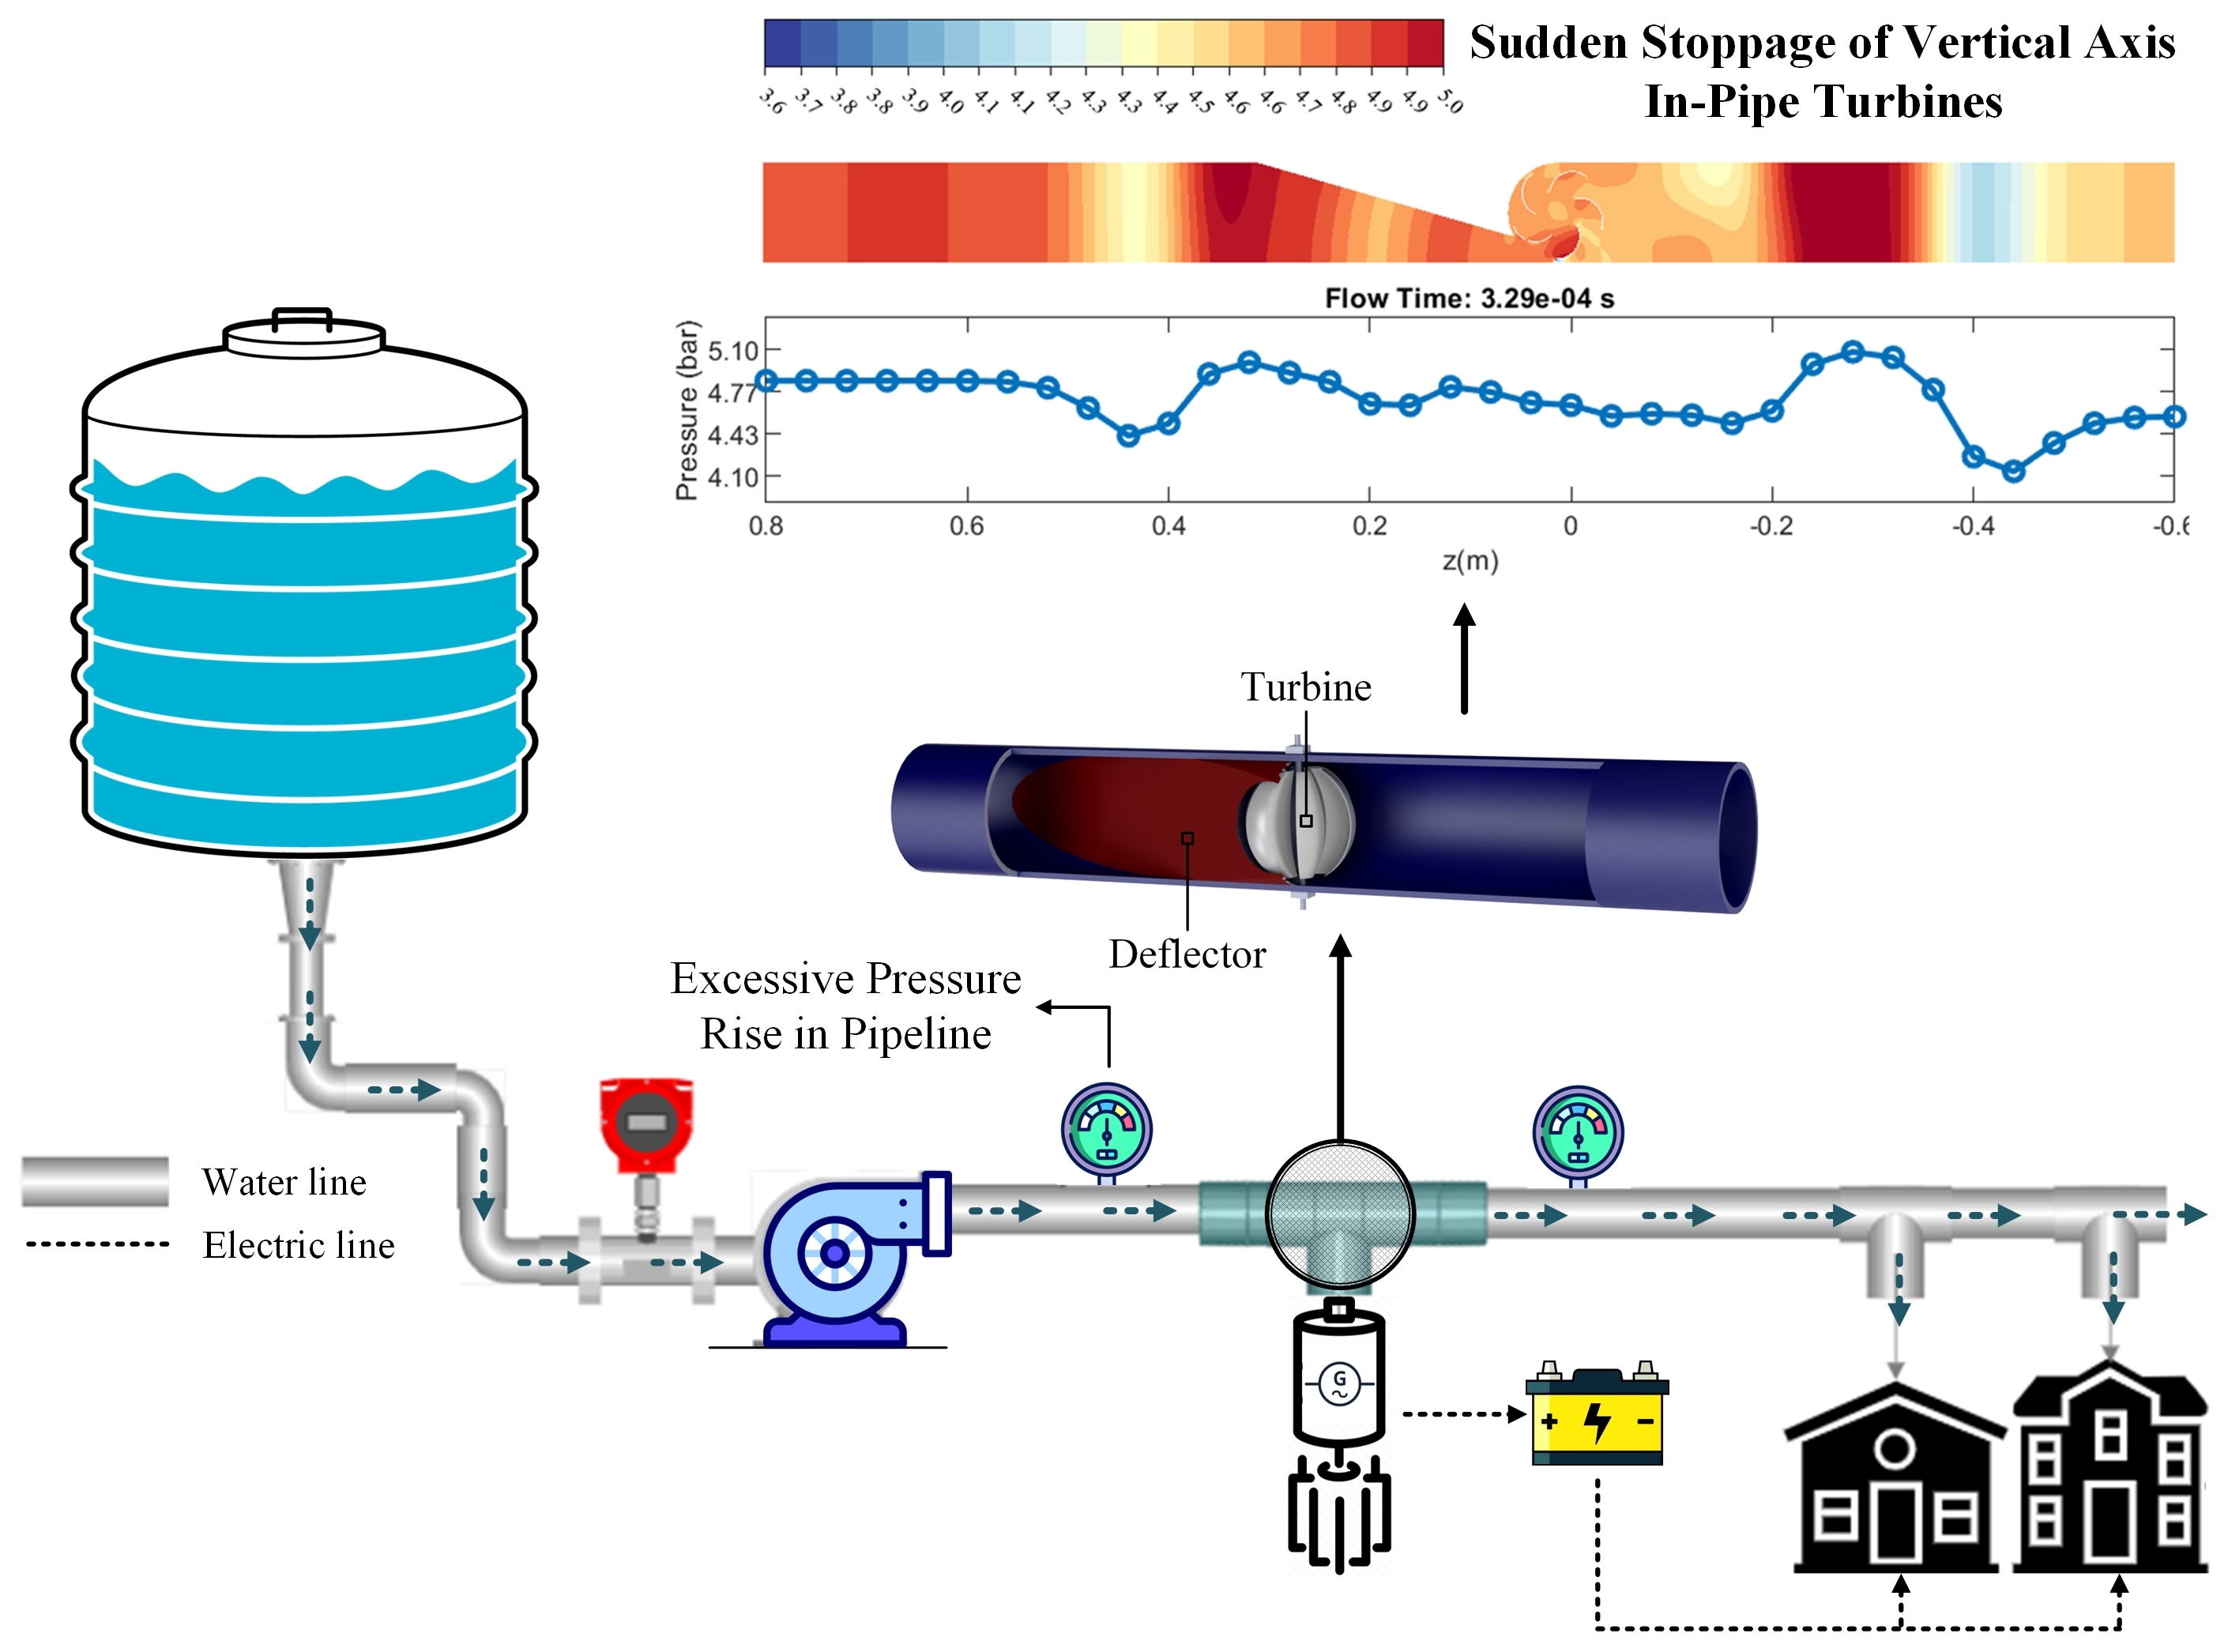

Supplement: Supplementary file 1 [file dab2c19b3d7a09ecfb001769.docx]
